# Supplementary material for: Lure the “enemy” deep: an innovative biomimetic strategy for enhancing the microwave absorption performance of carbon nanofibers
Source: Royal Society of Chemistry journal article supplement (doi:10.1039/d4ta06702a), 2024-01-01
Supplement: d4ta06702a1.pdf [file d4ta06702a1.pdf]

## Supplementary Information

### **Lure the “Enemy” Deep: An Innovative Biomimetic Strategy for Enhancing the Microwave Absorption Performance of Carbon Nanofibers**

Yu Deng <sup>a</sup>, Minghang Yang <sup>a</sup>, Yining Wang <sup>a</sup>, Mingguang Zhang <sup>a</sup>, Shuaining Zhou <sup>a</sup>, Xiangyang Lu <sup>a</sup>, Xigao Jian <sup>a</sup>, Yousi Chen <sup>a\*</sup>

<sup>a</sup> State Key Laboratory of Fine Chemicals, Frontiers Science Center for Smart Materials Oriented Chemical Engineering, Liaoning Technology Innovation Center of High Performance Resin Materials, Dalian Basalt Fiber Resin Matrix Composite Engineering Research Center, Department of Polymer Science & Engineering, Dalian University of Technology, Dalian 116024, P.R. China.

Corresponding Author E-mail: [chenyousi@dlut.edu.cn](mailto:chenyousi@dlut.edu.cn)

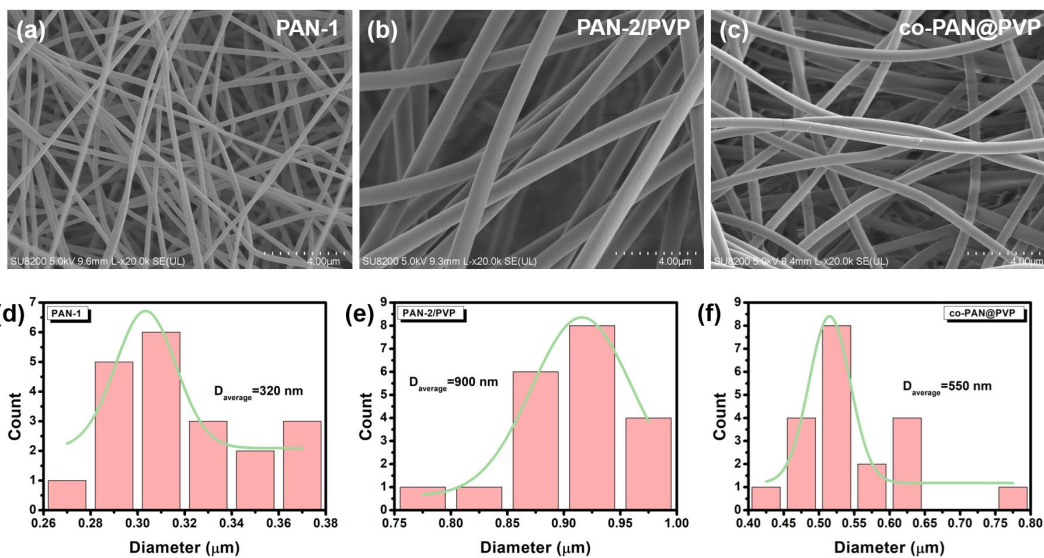

Fig. S1 SEM images and diameter distribution of NFs: (a, d) PAN-1; (b, e) PAN-2/PVP; (c, f) co-PAN@PVP.

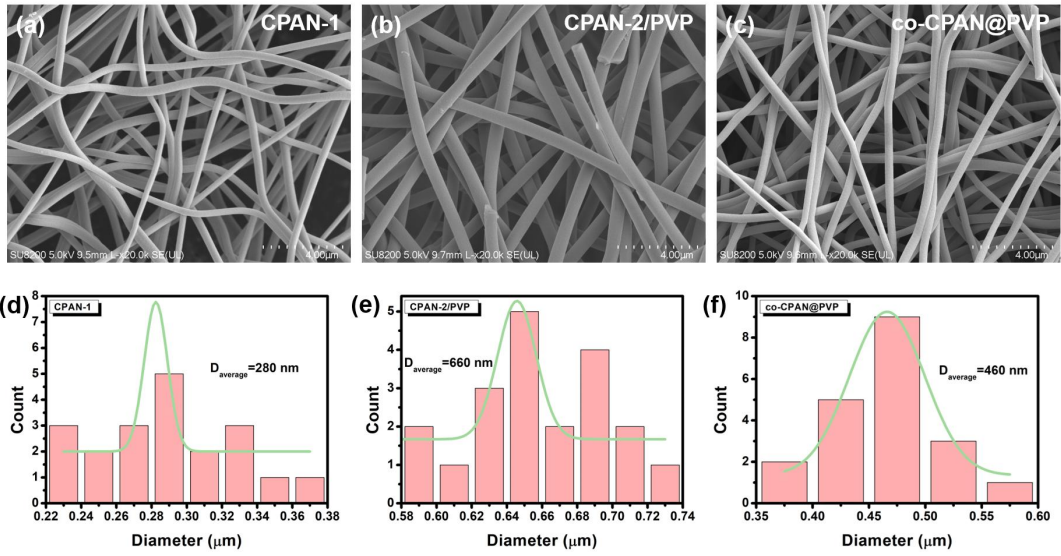

**Fig. S2** SEM images and diameter distribution of CNFs: (a, d) CPAN-1; (b, e) CPAN-2/PVP; (c, f)

co-CPAN@PVP.

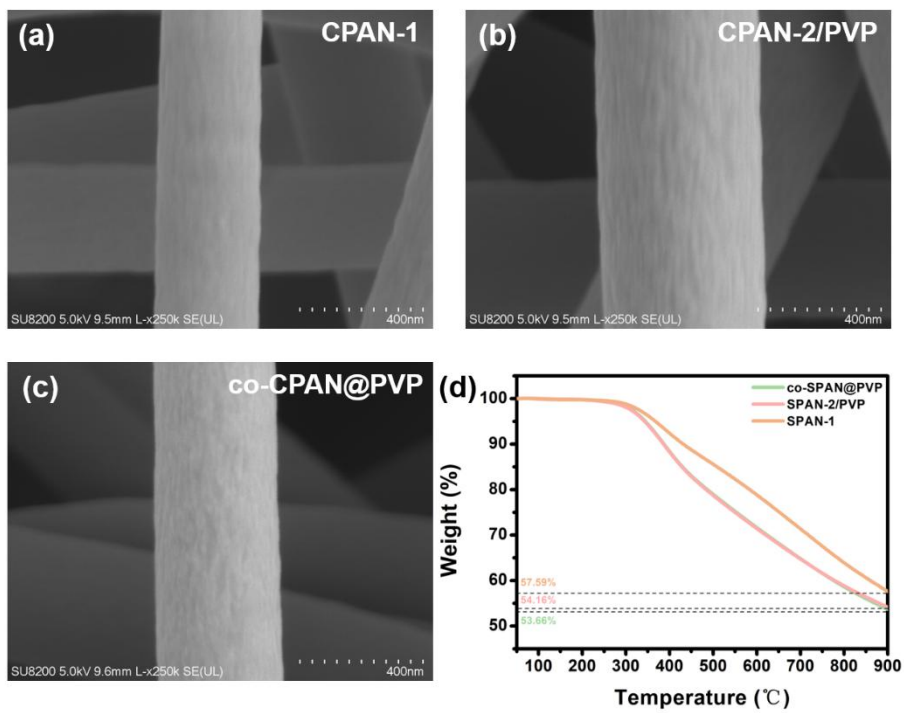

**Fig. S3** Surface morphology of CNFs: (a) CPAN-1; (b) CPAN-2/PVP; (c) co-CPAN@PVP and (d) TGA curves.

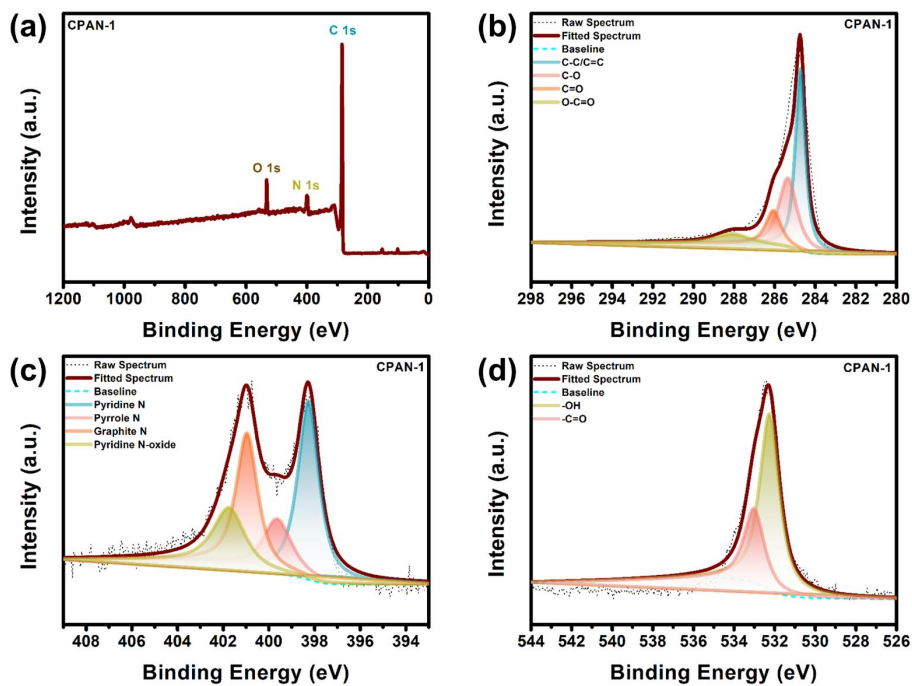

Fig. S4 (a) XPS survey spectra and (b) C 1s, (c) N 1s, and (d) O 1s spectra of CPAN-1.

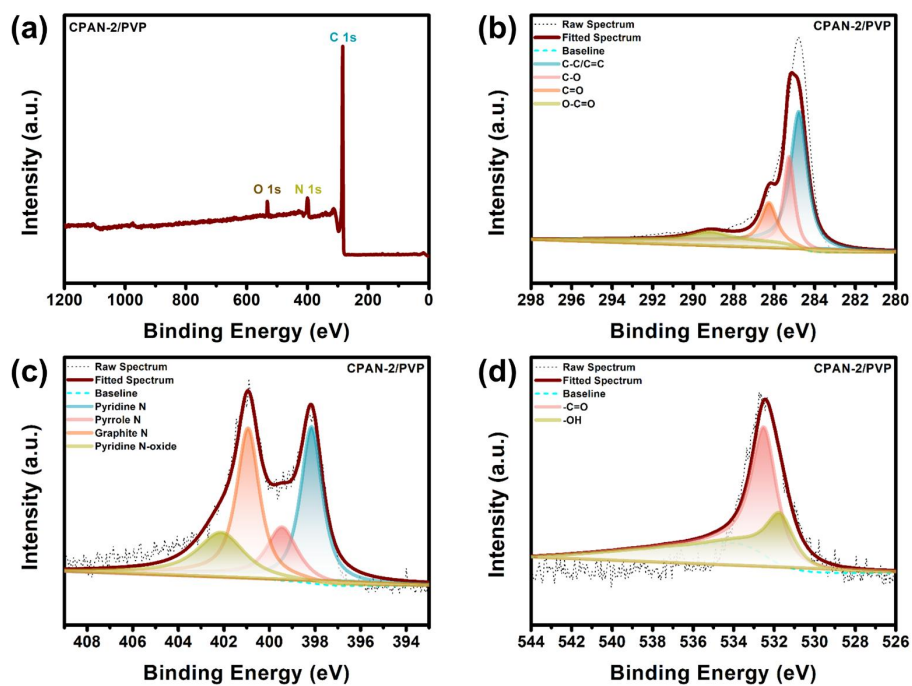

Fig. S5 (a) XPS survey spectra and (b) C 1s, (c) N 1s, and (d) O 1s spectra of CPAN-2/PVP.

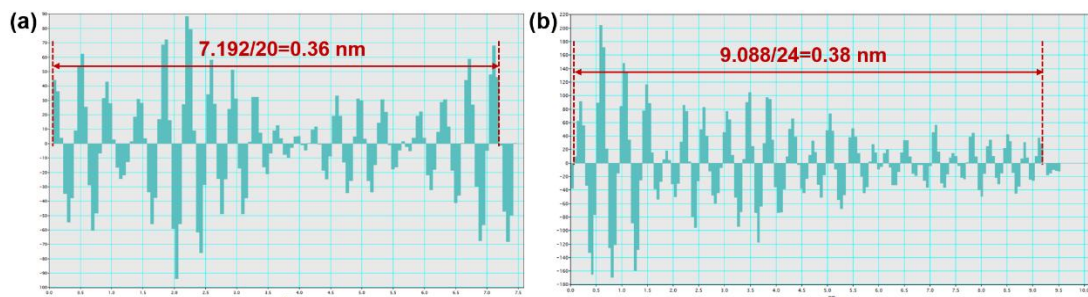

**Fig. S6** Calculation of TEM crystal plane spacing: (a) CPAN-1; (b) CPAN-2/PVP.

Table S1 Diameter shrinkage rate of NFs after carbonization

| Samples     | Shrinkage rate (%) |
|-------------|--------------------|
| CPAN-1      | 12.5               |
| CPAN-2/PVP  | 26.7               |
| co-CPAN@PVP | 16.4               |



The interlayer distance ( $d_{002}$ ) and stacking layer thickness ( $L_c$ ) of graphite grains were calculated according to formulas (S1) and (S2):<sup>1</sup>

$$d_{002} = \frac{K\lambda}{2\sin\theta} \quad (\text{S1})$$

$$L_c = \frac{K\lambda}{\beta\cos\theta} \quad (\text{S2})$$

where  $K$  is the shape factor with a value of 0.9,  $\lambda$  is the wavelength of the  $\text{CuK}\alpha$  X-ray (0.15046 nm), and  $\beta$  is the maximum half width at half maximum (FWHM) of the diffraction peak at  $2\theta$ .

Table S2 The interlayer spacing and stacking layer thickness of CNFs

| Samples     | $2\theta$ (degree) | $d_{002}$ (nm) | $L_c$ (nm) |
|-------------|--------------------|----------------|------------|
| CPAN-1      | 21.30              | 0.3664         | 1.353      |
| CPAN-2/PVP  | 21.17              | 0.3686         | 1.308      |
| co-CPAN@PVP | 20.76              | 0.3758         | 1.292      |

The average distance between defects ( $L_d$ ) and defect density ( $n_d$ ) of materials can be calculated as follows:<sup>2</sup>

$$L_d \text{ (nm)} = \sqrt{(1.8 \pm 0.5) \times 10^{-9} \lambda_L^4 \left(\frac{I_D}{I_G}\right)^{-1}} \quad (\text{S3})$$

$$n_d \text{ (cm}^{-2}\text{)} = \frac{(1.8 \pm 0.5) \times 10^{22}}{\lambda_L^4} \left(\frac{I_D}{I_G}\right) \quad (\text{S4})$$

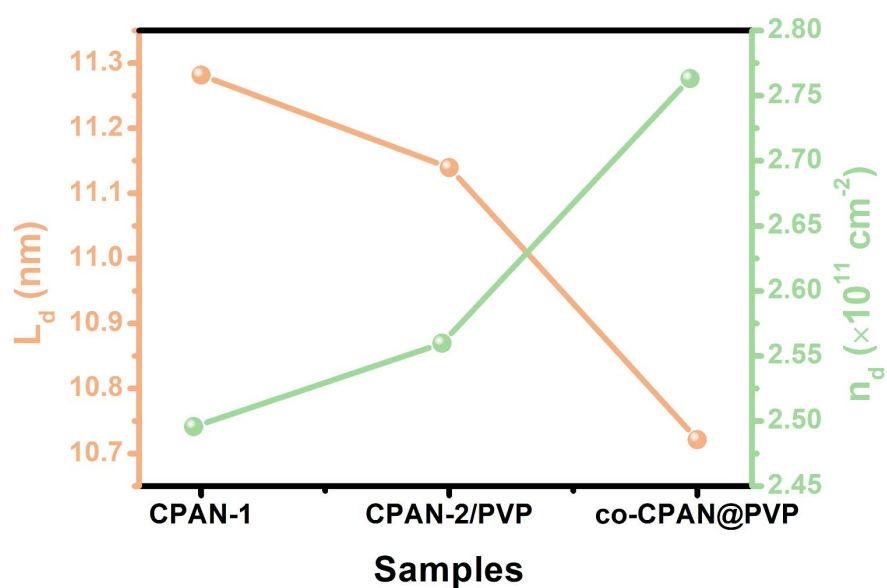

Fig. S7 Average  $L_d$  and  $n_d$  of CNFs.

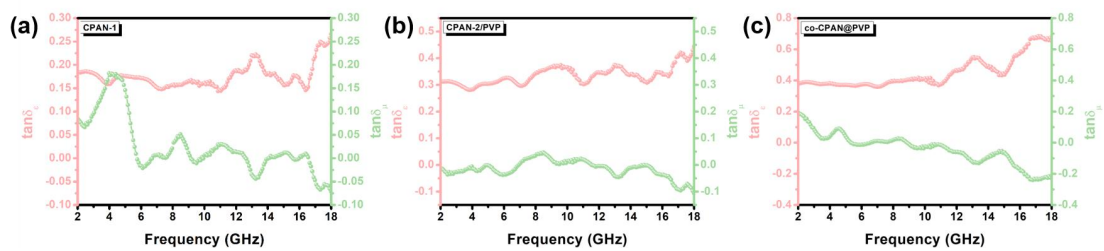

**Fig. S8** Comparison of dielectric loss and magnetic loss: (a) CPAN-1; (b) CPAN-2/PVP; (c) co-CPAN@PVP.

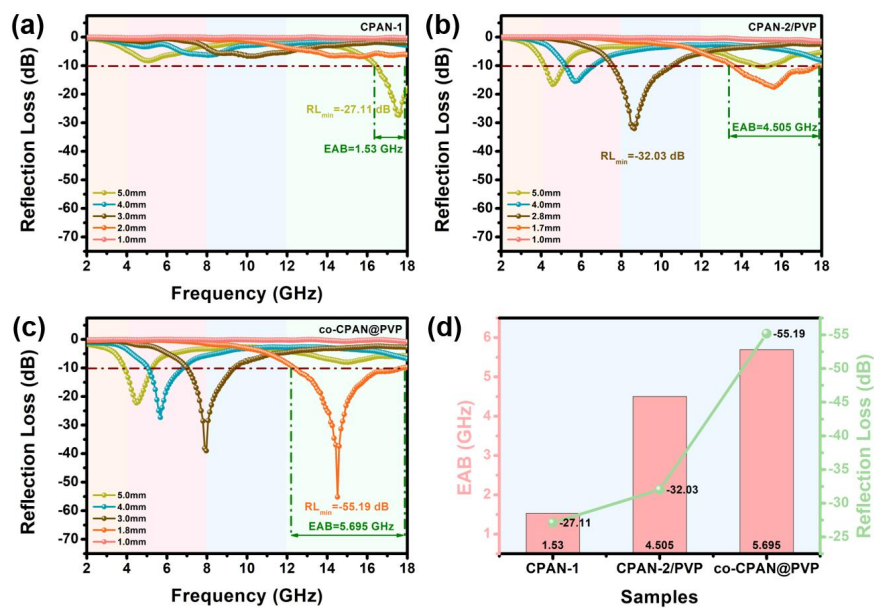

**Fig. S9** The  $RL_{\min}$  value at a given thickness of (a) CPAN-1, (b) CPAN-2/PVP and (c) co-CPAN@PVP; (d)

Comparison of absorption performance.

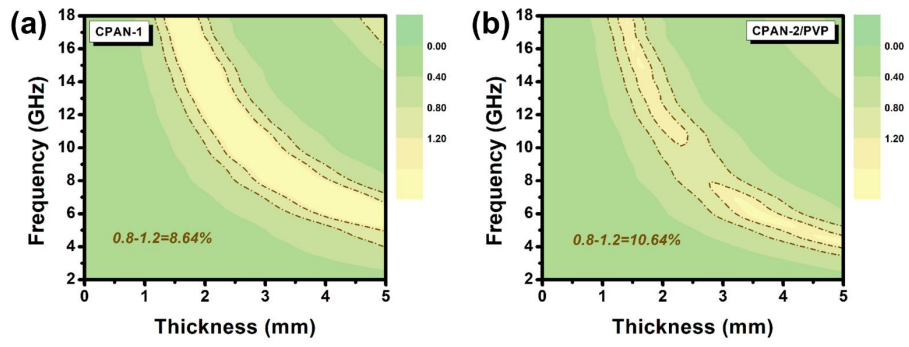

Fig. S10 Z of (a) CPAN-1 and (b) CPAN-2/PVP.

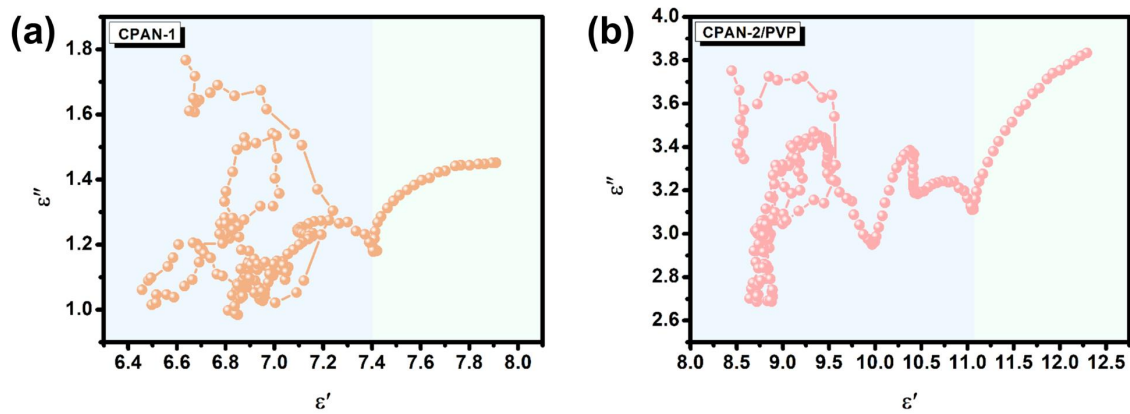

Fig. S11 Cole-Cole curves: (a) CPAN-1; (b) CPAN-2/PVP.

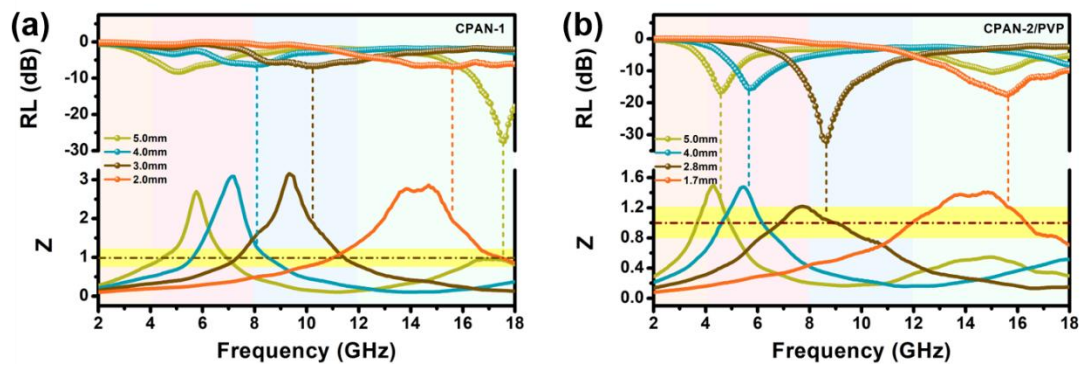

Fig. S12 RL and Z corresponding curves: (a) CPAN-1; (b) CPAN-2/PVP.

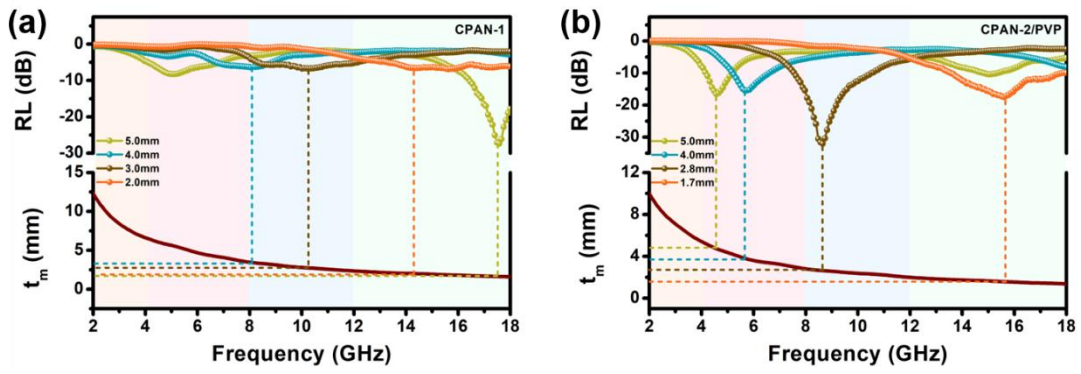

Fig. S13 RL and  $t_m$  corresponding curves: (a) CPAN-1; (b) CPAN-2/PVP.



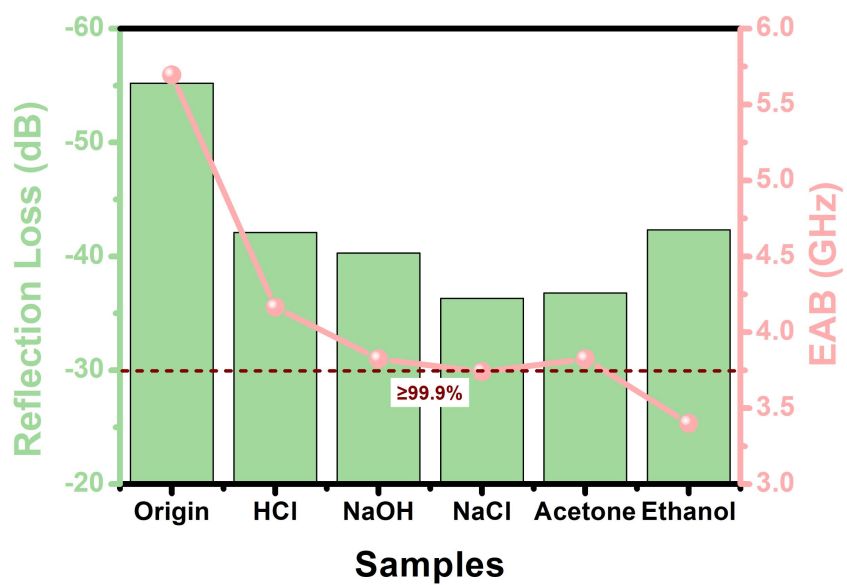

**Fig. S14** The absorption performance of co-CPAN@PVP in harsh environments.

$$SRL_1 = \frac{|RL_{\min}|}{\text{loading} * d} \quad (S5)$$

$$SEAB_1 = \frac{EAB}{\text{loading} * d} \quad (S6)$$

$$SRL_1 = \frac{|RL_{\min}|}{\text{loading}} \quad (S7)$$

$$SEAB_1 = \frac{EAB}{\text{loading}} \quad (S8)$$

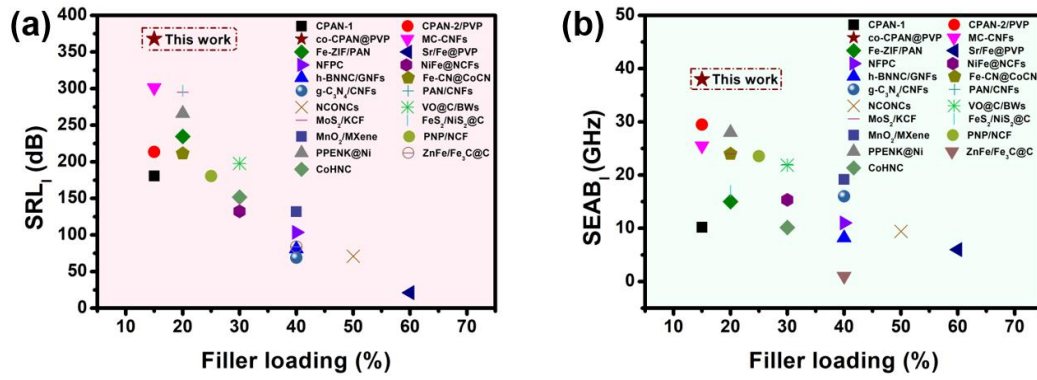

Fig. S15 Comparison of absorption performance of carbon-based MAMs in recent years.

Table S3 Comparison of MA performance of carbon-based MAMs in recent years

| Samples                               | RL (dB) | d <sub>1</sub> (mm) | EAB (GHz) | d <sub>2</sub> (mm) | loading (wt.%) | Ref.      |
|---------------------------------------|---------|---------------------|-----------|---------------------|----------------|-----------|
| CPAN-1                                | -27.11  | 5                   | 1.53      | 5                   | 15             | This work |
| CPAN-2/PVP                            | -32.03  | 2.8                 | 4.42      | 1.7                 | 15             | This work |
| co-CPAN@PVP                           | -55.19  | 1.8                 | 5.695     | 1.8                 | 15             | This work |
| MC-CNFs                               | -45.19  | 2.8                 | 3.825     | 2.8                 | 15             | 3         |
| Fe-ZIF/PAN                            | -46.9   | 2                   | 3         | 2                   | 20             | 4         |
| Str/Fe@PVP                            | -12.69  | 3.4                 | 3.6       | 2                   | 60             | 5         |
| NFPC                                  | -41.4   | 1.36                | 4.4       | 1.34                | 40             | 6         |
| NiFe@NCFs                             | -39.7   | 2                   | 4.6       | 1.45                | 30             | 7         |
| h-BNNC/GNFs                           | -32.28  | 2                   | 3.28      | 2                   | 40             | 8         |
| Fe-CN@CoCN                            | -42.27  | 2.5                 | 4.8       | 2.5                 | 20             | 9         |
| g-C <sub>3</sub> N <sub>4</sub> /CNFs | -27.56  | 2.3                 | 6.4       | 2.3                 | 40             | 10        |
| PAN/CNFs                              | -44.73  | 1.76                | 6.6       | 1.76                | 30             | 11        |
| NCONCs                                | -35.47  | 1.4                 | 4.71      | 1.4                 | 50             | 12        |
| VO@C/BWs                              | -59.3   | 2.34                | 6.56      | 2.34                | 30             | 13        |
| MoS <sub>2</sub> /KCF                 | -59     | 2.5                 | 4.8       | 2.5                 | 20             | 14        |
| FeS <sub>2</sub> /NiS <sub>2</sub> @C | -59.4   | 3.2                 | 3.4       | 2                   | 20             | 15        |
| MnO <sub>2</sub> /MXene               | -52.74  | 2.9                 | 7.68      | 2.9                 | 40             | 16        |
| PNP/NCF                               | -45.1   | 3.6                 | 5.89      | 2                   | 25             | 17        |
| PPENK@Ni                              | -53.2   | 1.5                 | 5.6       | 1.5                 | 20             | 18        |
| ZnFe/Fe <sub>3</sub> C@C              | -33.57  | 1.5                 | 4.16      | 1.34                | 40             | 19        |
| CoHNC                                 | -45.5   | 1.4                 | 3.04      | 1.4                 | 30             | 20        |

$$\varepsilon' = \varepsilon_\infty + \frac{\varepsilon_s - \varepsilon_\infty}{1 + \omega^2 \tau^2} \quad (\text{S9})$$

$$\varepsilon'' = \frac{\varepsilon_s - \varepsilon_\infty}{1 + \omega^2 \tau^2} \omega \tau + \frac{\sigma}{\omega \varepsilon_0} = \varepsilon_p'' + \varepsilon_c'' \quad (\text{S10})$$

where  $\omega$  is the angular frequency,  $\tau$  is the polarization relaxation time,  $\varepsilon_s$  is the static permittivity,  $\varepsilon_\infty$  stands for the dielectric permittivity at the high frequency limit and  $\sigma$  is the electric conductivity.<sup>21</sup>

$$E_a = E_1 + E_2 \quad (\text{S11})$$

$$E_1 = \pi f \varepsilon' E_0^2 + \pi f \mu' H_0^2 \quad (\text{S12})$$

$$E_2 = \pi f \varepsilon'' E_0^2 + \pi f \mu'' H_0^2 \quad (\text{S13})$$

where  $E_a$  is the absorbed incident EM energy,  $E_1$  and  $E_2$  represent the energy of storage and conversion part,  $E_0$  and  $H_0$  are the electric and magnetic field intensity amplitude of electromagnetic wave, respectively.<sup>22</sup>

$$w_s = \frac{E_1}{E_1 + E_2} \quad (\text{S14})$$

$$w_d = \frac{E_2}{E_1 + E_2} \quad (\text{S15})$$

$$w_r = \frac{E_2}{E_1} \quad (\text{S16})$$

where  $w_s$  is the electromagnetic energy storage efficiency,  $w_d$  is the conversion efficiency and  $w_r$  is the ratio of electromagnetic wave conversion to storage.

$$E_{2p} = \pi f \varepsilon_p'' E_0^2 \quad (\text{S17})$$

$$E_{2c} = \pi f \varepsilon_c'' E_0^2 \quad (\text{S18})$$

$$E_{2m} = \pi f \mu'' H_0^2 \quad (\text{S19})$$

where  $E_{2p}$ ,  $E_{2c}$  and  $E_{2m}$  represent conversion energy contributed by polarization, conductive and magnetic losses.

$$w_p = \frac{E_{2p}}{E_{2c} + E_{2p} + E_{2m}} \quad (\text{S20})$$

$$w_c = \frac{E_{2c}}{E_{2c} + E_{2p} + E_{2m}} \quad (\text{S21})$$

$$w_m = \frac{E_{2m}}{E_{2c} + E_{2p} + E_{2m}} \quad (\text{S22})$$

where  $w_p$ ,  $w_c$  and  $w_m$  represent the efficiency of converted EM energy by conductance, relaxation and magnetic mechanism.

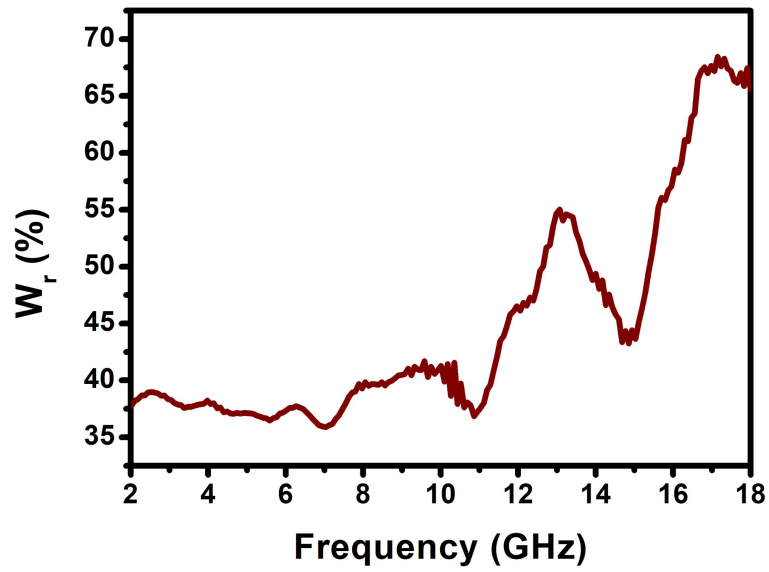

**Fig. S16** Microwave conversion efficiency to storage efficiency ratio for co-CPAN@PVP.

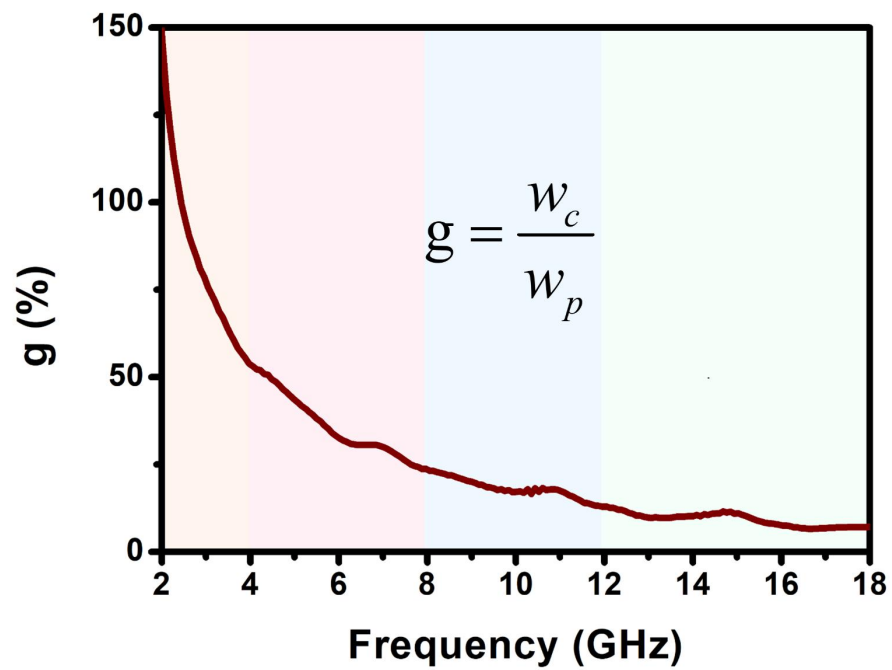

**Fig. S17** The ratio ( $g$ ) of EM energy conversion power contributed by charge transport and relaxation ( $w_c$  and  $w_p$ ).

## References

1. M. Yang, L. Sun, Q. Liu, Y. Deng, C. Liu, N. Li, J. Xu, Y. Chen and X. Jian, *Polym. Adv. Technol.*, 2024, **35**, e6300.
2. J. Yu, H. Luo, Z. Wang, S. Lv, Y. Cheng, F. Chen, S. Yan and X. Li, *J. Alloys Compd.*, 2024, **971**, 172757.
3. Y. Deng, M. Yang, Q. Liu, C. Liu, X. Jian and Y. Chen, *ACS Appl. Nano Mater.*, 2024, **7**, 3199-3209.
4. R. Sun, G. Yan, X. Zhang, Z. Li, J. Chen, L. Wang, Y. Wu, Y. Wang and H. Li, *Chem. Eng. J.*, 2023, **455**, 140608.
5. Z. Wang, L. Zhao, P. Wang, L. Guo and J. Yu, *J. Alloys Compd.*, 2016, **687**, 541-547.
6. S. Lv, H. Luo, Z. Wang, J. Yu, Y. Cheng, F. Chen and X. Li, *Carbon*, 2024, **218**, 118668.
7. F. Chen, S. S. Zhang, R. D. Guo, B. B. Ma, Y. Xiong, H. Luo, Y. Z. Cheng, X. Wang and R. Z. Gong, *Compos. Pt. B-Eng.*, 2021, **224**, 109161.
8. B. Zhong, W. Liu, Y. Yu, L. Xia, J. Zhang, Z. Chai and G. Wen, *Appl. Surf. Sci.*, 2017, **420**, 858-867.
9. S. Ren, P. Ju, H. Yu, B. Nan, L. Wang, A. Lian, X. Zang and H. Liang, *Coatings*, 2024, **14**, 133.
10. K. Yang, B. Fan, Y. Yang, S. Cai, M. Ying, X. Wang, G. Tong, W. Wu and D. Chen, *Carbon*, 2024, **219**, 118849.
11. J. Xiao, B. Zhan, M. He, X. Qi, X. Gong, J. L. Yang, Y. Qu, J. Ding, W. Zhong and J. Gu, *Adv. Funct. Mater.*, 2024, 2316722.
12. Y. Guo, H. Lu and X. Jian, *Ceram. Int.*, 2024, **50**, 8030-8041.
13. A. Ni, Z. Xiong, Y. Zhang, X. Jiang, X. Li, C. Liu and X. Zeng, *Carbon*, 2024, **221**, 118930.
14. X. Wang, X. Cao, E. Ding, M. Yin, L. Huang and L. Zhang, *Carbon*, 2024, **221**, 118887.
15. J. Wang, Y. Wang, W. Wang and K. Nan, *Carbon*, 2024, **218**, 118735.
16. S. Chen, Y. Meng, X. Wang, D. Liu, X. Meng, X. Wang and G. Wu, *Carbon*, 2024, **218**, 118698.
17. H. Xu, M. Liu, Z. Ma, B. Kang, X. Zhang, C. Zhu, X. Zhang and Y. Chen, *Chem. Eng. J.*, 2024, **479**, 147666.
18. C. Wang, L. Zong, Y. Pan, N. Li, Q. Liu, J. Wang and X. Jian, *Compos. Pt. B-Eng.*, 2021, **223**, 109114.
19. R. Guo, D. Su, K. Zou, C. Zhang, F. Cen, H. Luo, F. Chen and S. Jiang, *ACS Appl. Nano Mater.*, 2021, **4**, 11070-11079.
20. X. Han, S. Zhang, L. Qiao, P. Peng, C. Fu, K. Liu and Z. Ma, *ACS Appl. Nano Mater.*, 2024, **7**, 5414-5425.
21. T. Liu, Q. Zheng, W. Cao, Y. Wang, M. Zhang, Q. Zhao and M. Cao, *Advanced Composites and Hybrid Materials*, 2024, **7**.
22. Q. Wang, B. Niu, Y. Han, Q. Zheng, L. Li and M. Cao, *Chem. Eng. J.*, 2023, **452**.
